# Supplementary material for: 3D Printing of Solar Crystallizer with Polylactic Acid/Carbon Composites for Zero Liquid Discharge of High-Salinity Brine
Source: MDPI journal article supplement (doi:10.3390/polym15071656), 2023-03-27
Supplement: s1 [file s1]

# Supplementary Materials: 3D printing of Solar Crystallizer with Polylactic Acid/Carbon Composites for Zero Liquid Discharge of High-Salinity Brine

Qing Yin <sup>1</sup>, Fangong Kong <sup>1</sup>, Shoujuan Wang <sup>1</sup>, Jinbao Du <sup>1</sup>, Ling Pan <sup>2</sup>, Yubo Tao <sup>1,\*</sup>  
and Peng Li <sup>1,2,\*</sup>

<sup>1</sup> State Key Laboratory of Biobased Material and Green Papermaking, Qilu University of Technology, Shandong Academy of Sciences, Jinan 250353, China; qluyinqing@163.com (Q.Y.); kfgwsj1566@163.com (F.K.); nancy5921@163.com (S.W.); zyq19980609@163.com (J.D.)

<sup>2</sup> College of Material Science and Engineering, Northeast Forestry University, Harbin 150040, China; panling@nefu.edu.cn

\* Correspondence: taoyubo@qlu.edu.cn (Y.T.); lipeng@qlu.edu.cn (P.L.)

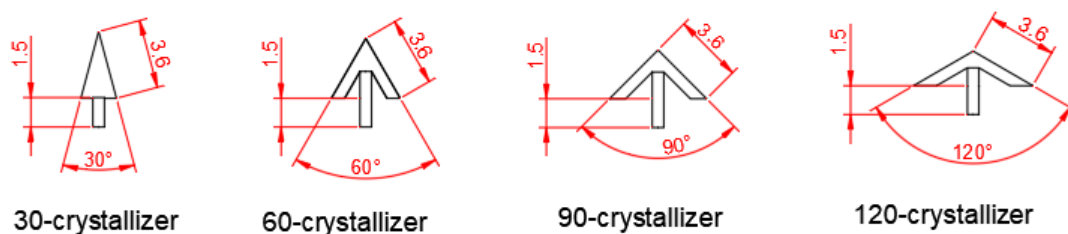

**Figure S1.** parameters for designing crystallizers

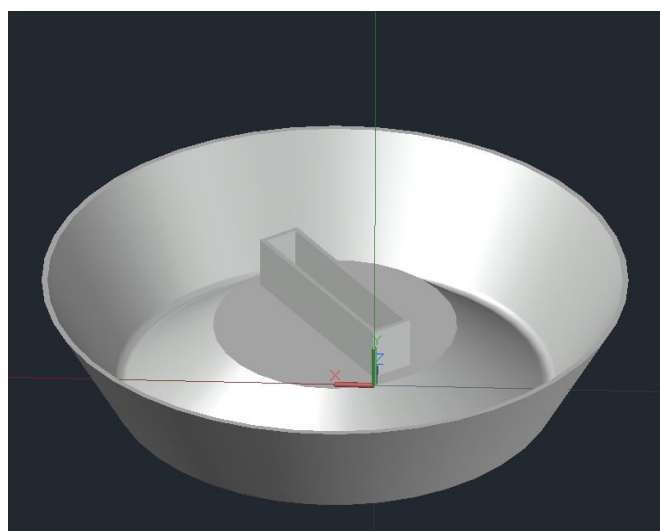

**Figure S2.** model of buoyancy layer
